# Supplementary material for: Single-agent maintenance therapy for advanced non-small cell lung cancer (NSCLC): a systematic review and Bayesian network meta-analysis of 26 randomized controlled trials
Source: PeerJ. 2016 Oct 20;4:e2550. doi: 10.7717/peerj.2550 (PMC5075715; doi:10.7717/peerj.2550)
Supplement: Data S1 [file peerj-04-2550-s006.xlsx]

## Sheet: study
study	year	type of article	total enrolled (treatment/control)	histology	inclusion Criteria	exclusion Criteria	Initial Therapy Prior to Maintenance	Maintenance Regimen		Maintenance Strategy	primary end point
								treatment	control
Mubarak	2012	full manuscript	55	Adenocarcinoma，Large cell，Mixed cell	aged ≥ 18 years , had an estim ated life expe ctancy of ≥ 12 week s , an d an E a stern Coop erative Onc ology Group performa nce status (ECOG PS) of 0 or 1. Othe r eligibility criteria include d: a histolog ic or cytolo gic diagno sis of Stage IIIB (with pleu ral effu sion and/ or po sitive suprac lavicula r nodes) or Stage IV N SCL C (using the sixth edition TNM staging syste m available at the…	an y serious con comitant syste mic disorde r; brain meta sta sis; clinica lly signi ficant third -space fluid colle ctions; significant w eight los s ( >10%) during the 6 weeks before study entry; pregnancy or breast-feeding; inability to interrupt aspirin or other nonster oidal anti-inflammatory ag ent s for a 5-day period (or 8-day period for long-acting agents such as piroxicam); inability or…	4 cycles of induction chemotherapy with pemetrexed (500 mg/m 2) and cisplatin (75 mg/m2)	pemetrexed (500 mg/m2 every 21 days) and best supportive care (BSC)	BSC	continuation	progression-free survival（PFS）
Paz-Ares	2013	full manuscript	539	nonsquamous NSCLC			4 cycles of induction pemetrexed（500mg/m2）and cisplatin（75mg/m2）on day 1 of a 21-day cycle	pemetrexed（500mg/m2）on day 1 of a 21-day cycle + BSC	placebo + BSC	continuation	progression-free survival（PFS）
Brodowicz	2006	full manuscript	215	Squamous cell carcinoma,Adenocarcinoma,Large cell,Other	have histologic or cytologic diagnosis of advanced NSCLC (stage IIIB disease with pleural effusion and/or positive supraclavicular nodes, or stage IV disease) not amenable to curative treatment. No prior chemotherapy was allowed and all other forms of therapy had to be completed at least 3 weeks before study enrollment. Prior radiotherapy (up to 60 Gy) was permitted if the irradiated area was not…	active infection, presence of symptomatic central nervous system metastases, inadequate liver function (bilirubin > 1.5 times upper normal limit [UNL] and alanine transaminase [ALT] or aspartate transaminase [AST] > 3.0 UNL or up to 5.0 UNL in the presence of hepatic metastases), inadequate renal function (creatinine > 1.25 times UNL), serious concomitant systemic disorder incompatible with the s…	gemcitabine 1250 mg/m2(days 1 and 8), plus cisplatin 80 mg/m2 (day 1, every 21 days) for a maximum of four cycles	Gemcitabine 1,250 mg/m2 on d1, d8, every 21 d1+ BSC until PD or PT (GEM arm)	BSC	continuation	Time to progression (TTP)
Belani	2010	abstract	255	NSCLC			Gemcitabine 1000 mg/m2 on d1 8 and carboplatin AUC5 on d1 every 21 d for 4 cycles of 21d each	Gemcitabine 1000 mg/m2 on d1, d8, every 21 d1 BSC until PD or PT	BSC	continuation	overall survival (OS)
Kelly	2008	full manuscript	243	Squamous cell carcinoma,Adenocarcinoma,Large cell,Other	Adult patients with pathologically confirmed and inoperable stage IIIA or IIIB NSCLC were eligible to participate in this study.Additional eligibility criteria included an Eastern Cooperative Oncology Group performance status of 0 to 1; measurable or nonmeasurable disease; no prior systemic therapy, radiation therapy, or complete surgical resection; and adequate organ function. Patients with a fo…	Patients with pleural or pericardial effusions or patients with multiple tumors within the lung were excluded.	cisplatin 50 mg/m2 on days 1 and 8 + etoposide 50 mg/m2 on days 1 to 5, every 28 days for 2 cycles with concurrent thoracic radiation (1.8- to 2-Gy fractions per day; total dose, 61 Gy) followed by 3 cycles of docetaxel 75 mg/m2	gefitinib 250 mg/d until disease progression	placebo	switch	overall survival (OS)
Gaafar	2011	full manuscript	173	Squamous，Adenocarcinoma，Undifferentiated，Large cell carcinoma	Patients with histologically or cytologically confirmed stage IIIB or IV NSCLC (according to the UICC 6th staging system), who were; not amenable to local therapy, non-progressing after prior platinum based chemotherapy (2–6 cycles), and without unacceptable toxicity	previous antiEGFR therapy, symptomatic brain metastasis, other malignancies, pregnancy or breast-feeding and interstitial pulmonary disease.	four cycles of platinumbased chemotherapy	gefitinib 250 mg/d until progression or unacceptable toxicity	placebo	switch	overall survival (OS)
Zhang	2012	full manuscript	296	Adenocarcinoma/bronchoalveolar carcinoma，Squamous-cell carcinoma，Other	Patients were aged 18 years or older, were of east Asian ethnic origin, had a life expectancy of more than 12 weeks, histologically or cytologically confi rmed stage IIIb or IV NSCLC, a WHO performance status of 0–2, and had completed four cycles of first-line platinum-based doublet chemotherapy without disease progression or unacceptable toxic effects.	appendix	4 cycles of Platinum-based chemotherapy	gefitinib (250 mg per day orally)	placebo	switch	progression-free survival（PFS）
Cai	2015	full manuscript		EGFR+			four cycles of platinum-based chemotherapy （a combination of Cisplatin (80-120 mg/m2 body surface area) and Paclitaxel injection (Taxol, 135-250 mg/m2 body surface area), once every three weeks）	gefiinib maintenance therapy of 250 mg/day by oral	observation	switch	pfs
Cappuzzo	2010	full manuscript	889	Adenocarcinoma/bronchoalveolar carcinoma，Squamous-cell carcinoma，Other	run-in phase of the study had to be aged 18 years or over, with histologically documented, measurable (according to Response Evaluation Criteria In Solid Tumours [RECIST] 1.025), unresectable or metastatic NSCLC.	previous exposure to anti-EGFR agents; uncontrolled, symptomatic brain metastases; and any other malignancies within the previous 5 years (excluding carcinoma in situ	4 cycles of Cisplatin or Carboplatin plus Paclitaxel	erlotinib 150 mg/day	placebo	switch	progression-free survival（PFS）
Perol	2012	full manuscript	464	Squamous，Adenocarcinoma，Unknown	age 18 to 70 years with histologically or cytologically documented stage IV NSCLC or stage IIIB NSCLC with documented pleural involvement, measurable disease according to Response Evaluation Criteria In Solid Tumors 1.022 and an Eastern Cooperative Oncology Group performance status (PS) of 0 or 1.	prior therapy with an EGFR inhibitor, concurrent radiotherapy except for bone metastasis, pre-existing interstitial lung disease, any other malignancies within the previous 5 years (except for treated carcinoma in situ of the cervix or basal cell skin cancer), and symptomatic brain metastasis	four cycles of induction chemotherapy (cisplatin 80 mg/m2 day 1 plus gemcitabine 1,250 mg/m2 day 1, day 8 of a 3-week cycle)	gemcitabine(1,250mg/m2 day 1, day 8 of a 3-week cycle), or erlotinib (150 mg/d).	observation	continuation or switch	progression-free survival（PFS）
Hanna	2008	full manuscript	147	nsclc	Patients with histologic or cytologic confirmation of NSCLC with unresectable stage IIIA or IIIB disease were assessed for eligibility.	Patients with disease extending into the cervical region were not eligible	cisplatin 50 mg/m2 IV on days 1, 8, 29, and etoposide 36 and 50 mg/m2 IV on days 1-5 and 29-33 concurrently with chest radiation to 59.40 Gy	docetaxel 75 mg/m2 IV every 21 days for three cycles	observation	switch	overall survival（OS）
Fidias	2009	full manuscript	309	Squamous cell carcinoma,Adenocarcinoma,Large cell,Other	18 years old with histologically or cytologically confirmed stage IIIB plus pleural effusion or stage IV NSCLC; life expectancy of 12 weeks; Eastern Cooperative Oncology Group performance status (PS) of 0, 1, or 2; and adequate renal, hepatic, and bone marrow function.		four 21-day cycles Gemcitabine (1,000 mg/m2)（days 1 and 8）followed by carboplatin (area under the curve 5) on day 1	immediate docetaxel(docetaxel 75 mg/m2 on day 1 every 21 days, with maximum of six cycles)	delayed docetaxel	switch	overall survival (OS)
Karayama	2013	full manuscript	51	Adenocarcinoma，other	Chemotherapy-naı¨ve patients aged 20–75 years with pathologically confirmed inoperable stage IIIB or IV nonsquamous NSCLC and an Eastern Cooperative Oncology Group (ECOG) performance status of 0–1 were eligible for unless the primary tumor site was irradiated.	Exclusion criteria included squamous cell lung cancer, indications for radical radiotherapy, severe uncontrolled complications and active interstitial lung disease. For staging, computed tomography (CT) of the thorax and abdomen, magnetic resonance imaging of the brain, and radioisotopic bone imaging were performed inclusion. Additional eligibility criteria included adequate hematopoietic, renal …	intravenous pemetrexed 500 mg/m2 and intravenous carboplatin at an AUC of 6 on day 1 of a 21-day cycle, for four cycles	intravenous pemetrexed 500 mg/m2，on day 1 of a 21-day cycle.	intravenous docetaxel 60 mg/m2, on day 1 of a 21-day cycle.	continuation/switch	survival without toxicity，the time from the initiation of maintenance therapy to the first date of any grade 3/4 toxicity or death due to any cause
Carter	2012	full manuscript	119	Adenocarcinoma,Large-cell carcinoma,Squamous cell carcinoma			paclitaxel (200 mg/m2) and carboplatin (target AUC 6) every 3 weeks for 2 cycles，followed 21 days later (day 43) by XRT 66.6 Gy over 7 weeks (37 fractions) with concomitant weekly paclitaxel 45 mg/m2 carboplatin AUC 2 for 7 weeks，followed 21-28 days later by	Maintenance therapy consisting of weekly paclitaxel 70 mg/m2 3 weeks followed by 1 week of rest. These 4-week cycles were continued for a total of 6 months.	Maintenance therapy consisting of weekly paclitaxel 70 mg/m2 3 weeks followed by 1 week of rest. These 4-week cycles were continued for a total of 6 months.	continuation	OS？
Belani	2003	full manuscript	130	Adenocarcinoma,Large-cell carcinoma,Squamous cell carcinoma			In the initial therapy phase, patients on arm 1 received paclitaxel 100 mg/m2 weekly for 3 of 4 weeks with carboplatin (AUC 6) on day 1 of each 4-week cycle for a total of four cycles. Patients on arm 2 received paclitaxel (100 mg/m2) and carboplatin (AUC 2) weekly for 3 of 4 weeks of each of four cycles. Patients on arm 3 received paclitaxel (150 mg/m2 in cycle 1 and 100 mg/m2 in cycle 2) and ca…	paclitaxel cycle consisted of 70 mg/m2 weekly for 3 of 4 weeks	observation	continuation	objective response rate and time to disease progression
Butts	2005	full manuscript	171	nsclc			first-line treatment, which consisted of either chemotherapy alone or chemotherapy and radiotherapy (completed at least 3 weeks before study entry with no upper limit for time after completion)	L-BLP24 plus best supportive care (BSC)	BSC	switch	OS
Butts	2014	full manuscript	1513	Squamous，Adenocarcinoma，other			histological subtypes of non-small-cell lung cancer. Between 4 and 12 weeks before randomisation, patients had to have completed at least two cycles of platinumbased chemotherapy (given sequentially or concurrently) with a minimum of 50 Gy of radiation	tecemotide	placebo	switch	OS
Giaccone	2015	full manuscript	532	nsclc			Patients had stable disease or response following up to 6 cycles of a platinum-based frontline chemotherapy regimen, with or without radiation therapy.	L-BLP24	placebo	switch	OS
O'Brien	2015	full manuscript	102	nsclc			imab was allowed with the induction chemotherapy. The most commonly used platinum based chemotherapy regimens were allowed and patients were allowed to continue up to six cycles as per local policy.	panzopanib	placebo	switch	OS
Socinski	2014	abstract	210	nsclc				sunitinib	placenbo	switch	PFS
Ahn	2013	full manuscript	118	Squamous，Adenocarcinoma，Unknown			4 cycles of platinumdoublet first-line chemotherapy	300 mg/day of vandetanib orally	placebo	switch	A PFS rate at 3 months
Johnson	2008	full manuscript	186	Squamous，Adenocarcinoma，other			completion of at least three and no more than 6 months of one chemotherapy regimen	oral CAI at a dose of 250 mg daily	placebo	switch	OS
Westeel	2005	full manuscript	181	Squamous，Adenocarcinoma，large cell			intravenous MIC (mitomycin C at 6 mg· m− 2 on day 1, ifosfamide at 1.5 g· m− 2· day−1 on days 1 through 3, and cisplatin at 30 mg· m− 2· day− 1 on days 1 through MIC cycles were repeated every 4 weeks for a total of two cycles for patients with stage IIIB disease and a total of four cycles for patients with“ wet ” stage IIIB (i.e., pleural or pericardial involvement), stage IIIB with supraclavicu…	vinorelbine intravenously at a dose of 25 mg· m−2· wk−1 for 6 months, beginning 16 weeks after the fi rst MIC cycle in patients treated with induction chemotherapy and 17 weeks after the fi rst MIC cycle in patients treated with induction chemoradiation.	observation	switch	OS
Hu	2010	full manuscript	63	Squamous，Adenocarcinoma，other			four cycles of platinumbased chemotherapy		observation	switch	TTP？
Alfonso	2014		176	nsclc					placebo	switch	OS

## Sheet: baseline
study	Mean Age(year)			F/M(%)			stage(%)						smoke(%)						histology(%)						Race(%)
	treatment	control	combine	treatment	control	combine	III B			VI			non-smoker			smoker（current & former）			Squamous cell carcinoma			Adenocarcinoma,Large cell,Other			asian			white			other
							treatment	control	combine	treatment	control	combine	treatment	control	combine	treatment	control	combine	treatment	control	combine	treatment	control	combine	treatment	control	combine	treatment	control	combine	treatment	control	combine
Ciuleanu 2009	60.6	60.4	60.5	40	37.9	37.3	18	21	19	82	79	81	26	28	27.3	73	71	72.7	26	30	27.5	74	70	72.5	32	30	31.5	63	67	64.6	5	3	3.9
Mubarak 2012	61	59	60（median）	40	58.8	48.6	32.1	37	34.5	67.9	63	65.5	42.9	37	40	57.1	63	60	0	0	0	100	100	100	0	0	0	92.9	96.3	94.5	7.1	3.7	5.5
Paz-Ares 2013			61（median）			72.4			9			91			21.7			78.3						87（aden）100（non-squa）						95
Brodowicz 2006	58	56	57.3	42.3	25.9	36.4	27.5	26.5	27.2	72.5	73.5	72.8	/	/	/	/	/	/	42	38.2	40.8	44.9	39.7	59.2	/	/	/	/	/	/	/	/	/
Belani 2010			67（median）	25.9	66.7	46.3	26.5	22	24.3	73.5	78	75.7
Kelly 2008	62	61	61.5	49.4	68.9	58.8	55	49	51.9	45	51	48.1（IIIA）	/	/	/	/	/	/	31	29	24.7	69	71	75.3	0	2	1.4	97	86	90.9	3	12	7.7
Gaafar 2011	61	62	61（median）	28.4	31.8	30.1	19	15	17	81	85	83	21	23	22	79	77	78	17	22	20	83	78	80	/	/	/	/	/	/	/	/	/
Zhang 2012	55	55	55（median）	78.3	60.9	69.1							53	55	54	47	45	46	18	20	19.3	82	80	80.7	100	100	100	0	0	0	0	0	0
Cappuzzo 2010	60	60	60（median）	36.4	33.4	34.9	26	24	25.4	74	76	74.6	18	17	17.2	82	83	81.8	38	43	40.6	62	57	59.4	14	15	14.8	84	83	84.3	2	2	0.9
Perol 2012 gem	57.9	59.8	58.3	36.3	37.2	36.9	9.3	9.2	8.4	90	89.7	89	11	7.7	9.9	89	92.3	90.1	22.1	19.4	19.6	77.9	80.6	80.4
Perol 2012 erl	56.6		58.3	37.2		36.9	7.4		8.4	88.4		89	11		9.9	89		90.1	17.4		19.6	82.6		80.4
Hanna 2008
Fidias 2009	65.4	65.5	65.5	61	60.8	60.9	17.6	15.4	16.5	82.4	83.3	82.8	/	/	/	/	/	/	16.3	18.6	17.5	83.7	81.4	82.5	3.9	2.6	3.2	83.7	85.9	84.8	12.4	11.5	12
Karayama 2013 pem	65	/	65	62.5	/	64	11.5	/	15.7	88.5	/	84.3	34.6	/	31.4	65.4	/	68.6	0			100	/	100	/	/	/	/	/	/	/	/	/
Karayama 2013 doc	65			31.6			20			80			28			72						100			/	/	/	/	/	/	/	/	/
Cai 2013			61			87.5			/									33.3						100			100
Carter 2012			63.5			50.6			52.9			IIIA						/			23.5			76.5			/			87.4
Belani 2003			65.5			60			25			75			/			/									/			/
Butts 2005			59			80			100						/			/			/						/
Butts 2014			61.2			46.5			60.7			IIIA						93.9			46.2			53.8			4.6			92.3
Ahn 2013			61			56			23.1									64.2			17.1			82.9			/
Johnson 2008			65.8			73.8			12.4（A+B)									78.5			18.3			81.7			/			96.8
Westeel 2005			62			7.7			51.9									/			59.7			40.3			/			/
Hu 2010			56.7			70.3			57.1			IIIA									46			54			100
Giaccone 2015	61.5	60.5	61			73.3			92.1			IIIA 7.9						/			27.4			72.6			7.7			88.9			3.4
O'Brien 2015			64。4			121.7			/			/			20.6			79.4			19.6			80.4			/			/
Socinski 2014			66			80			77.6			22.4			8.3			91.7			33.2			66.8

## Sheet: outcome
study	Number of people		overall survival (OS)(month)					progression free survival (PFS)					time to progression (TTP)(month)				objective response rate (ORR)(%)
	T	C	treatment	control	HR	95%CI	P	treatment	control	HR	95%CI	P	treatment	control	HR	95%CI	treatment	control
Ciuleanu 2009	441	222	13.4	10.6	0.79	0.65 - 0.95	0.012	4.3	2.6	0.5	0.42 - 0.61	< 0.0001					6.8	1.8
Mubarak 2012	28	27	12.2	11.8	1.13	0.56 - 2.28	0.36195	3.2	3.2	0.76	0.42 - 1.37	0.1815
Paz-Ares 2013	359	180	13.9	11	0.78	0.64 - 0.96	0.0195	3.9	2.6	0.62	0.49 - 0.79	< 0.001					71.8	59.6
Brodowicz 2006	138	68	10.2	8.1	0.840	0.516 - 1.368							3.6	2	0.690	0.557 - 0.855	50.7	45.6
Belani 2010	128	127	8	9.3	0.97	0.72 - 1.30	0.84	3.9	3.8	0.974	0.917 - 1.035
Kelly 2008	118	125	23	35	0.633	0.44 - 0.91	0.013	8.3	11.7	0.8	0.58 - 1.10	0.17
Gaafar 2011	87	86	10.9	9.4	0.83	0.60 - 1.15	0.2	4.1	2.9	0.61	0.45 - 0.83	0.0015
Zhang 2012	148	148	18.7	16.9	0.84	0.62 - 1.14	0.26	4.8	2.6	0.42	0.33 - 0.55	< 0.0001					24	1
Cai 2015	7	7
Cappuzzo 2010	438	451	12	11	0.81	0.70 - 0.95	0.0088	3.075	2.775	0.71	0.62 - 0.82	< 0.0001					11.9	5.4
Perol 2012 gem	154	155	12.1	10.8	0.89	0.69 - 1.15	log P = 0.3867	3.8	1.9	0.56	0.44 - 0.72	log p < 0.001
Perol 2012 erl	155		11.4		0.87	0.68 - 1.13	log P = 0.3043	2.9		0.69	0.54 - 0.88	log p = 0.003
Shi 2014	28	26	9.9	10.5				3.98	5.02
Hanna 2008	73	74	23.2	21.2	0.92	0.48-1.76	0.883
Fidias 2009	153	156	12.3	9.7	0.840	0.652 - 1.083		5.7	2.7	0.710	0.549 - 0.918						35.9？	11.2？
Karayama 2013 pem	26	/	20.6	/	0.79(docvs pem)	0.30 - 2.00	0.622	4.1	/	0.56	0.28 - 1.08	0.084
Karayama 2013 doc	25		19.9					8.2
Carter 2012	61	58	16.1	26.9				8.2	10.2
Belani 2003	65	65	14.75	11				5.5	3.25
Butts 2005	88	83	17.2	13	0.745
Butts 2014	829	410	25.6	22.3	0.88			10	8.4
Giaccone 2015	270	262	20.3	17.8	0.94	0.73-1.20	0.594	4.3	4	0.99	0.82-1.20	0.947
O'Brien 2015	50	52	17.4	12.3	0.72	0.4-1.28	0.257	4.3	3.2	0.67	0.43-1.03	0.068
Socinski 2014	106	104	11.7	11.2	1.08		0.63	4.3	2.8	0.59		0.0008
Ahn 2013	75	42	15.6	20.8				2.7	1.7	0.667
Johnson 2008	94	92	11.4	10.5				2.8	2.4
Westeel 2005	91	90	12.3	12.3	1.08			5	3	0.77
Hu 2010	33	30	16.2	15.8				8.5	5

## Sheet: toxicity
study	Neutropenia		Thrombocytopenia		Anemia		Nausea		vomiting		Alopecia		rash		Diarrhea		Pneumonitis/infiltrates
	T	C	T	C	T	C	T	C	T	C	T	C	T	C	T	C	T	C
Ciuleanu 2009	3	0			3	1	1	1	1	0			1	0	1	0
Mubarak 2012	7.1	0			7.1	3.7	0	0	0	0
Paz-Ares 2013	5.8	0	1.9	0	6.4	0.6	0.6	0	0.3	0			0	0	0.3	0
Brodowicz 2006	14.9		1.7		2.6		0.8				4.3
Belani 2010	13.3	1.6	9.4	1.4	9.4	2.4	0	<1	0	<1
Kelly 2008									2.8				7.5		6.5		2.8
Gaafar 2011									1.2	0			2.4	0	1.2	0
Zhang 2012													0	0	0	0
Cai 2015
Cappuzzo 2010					1	1							9	0	2	0
Perol 2012 gem	20.8	0.6	6.5	0	2.6	1							0	0	0.6	0
Perol 2012 erl	0.6		0		1.3								9		0.6
Shi 2014			0	0	7.1	3.8	0	0	0	0			67.9	51.8	21.4	34.6
Hanna 2008
Fidias 2009	27.6	28.6	0	0	0.7	0	0	1	0	1					0.7	5.1
Karayama 2013 pem	12	/	0	/	12	/	0	/	0	/	0	/	0	/	0	/
Karayama 2013 doc	72		4		8		0		0		0		0		0
Carter 2012	16.4	32.8	6.6	8.6			0	3.4	0	3.4
Belani 2003
Butts 2005
Butts 2014							0	0
Giaccone 2015							14.8	13.7					8.5	3.8
Socinski 2014	5.66	0.96	11.32	0	5.66	0							10.38	0
O'Brien 2015							40	26	24	18			14	16
Ahn 2013							1.3	0					13.3	0
Johnson 2008					0	0	2.2	0	3.3	0
Westeel 2005	44		3.3		8.8
Hu 2010	57.6		6		9		45.5		3

## Sheet: OS-HR
name	treatment	base	HR	LCI	UCI	ln（HR）	se（ln（HR)）
Ciuleanu 2009	pem	non	0.79	0.65	0.95	-0.241038	0.0968086
Mubarak 2012	pem	non	0.95	0.46	1.97	-0.0492476	0.371062
Paz-Ares 2013	pem	non	0.78	0.64	0.96	-0.243555	0.103435
Brodowicz 2006	gem	non	0.840	0.516	1.368	-0.174149	0.248724
Belani 2010	gem	non	0.97	0.72	1.3	-0.0330699	0.150732
Kelly 2008	gef	non	0.633	0.44	0.91	-0.457646	0.185375
Gaafar 2011	gef	non	0.83	0.6	1.15	-0.185532	0.165966
Zhang 2012	gef	non	0.88	0.68	1.14	-0.127317	0.131809
Cai 2015	gef	non	0	0
Cappuzzo 2010	erl	non	0.81	0.7	0.95	-0.203984	0.0779035
Perol 2012	gem	non	0.89	0.62	1.28	-0.115588	0.184922
Perol 2012	erl	non	0.87	0.68	1.13	-0.131722	0.129561
Perol 2012	gem	erl	1.05	0.72	1.51	0.0418028	0.188932
Hanna 2008	doc	non	1.06	0.75	1.5	0.0588915	0.176823
Fidias 2009	doc	non	0.840	0.652	1.083	-0.173988	0.12945
Karayama 2013	pem	doc	1.266	0.5	3.33	0.254913	0.483704
Carter 2012	pac	non	1.22	0.75	1.99	0.200226	0.248933
Belani 2003	pac	non	1.21	0.72	2.03	0.189766	0.264423
Butts 2005	BLP	non	0.745	0.533	1.042	-0.294046	0.171014
Butts 2014	BLP	non	0.88	0.75	1.03	-0.129062	0.0809288
Giaccone 2015	bel	non	0.94	0.73	1.2	-0.0661946	0.126794
O'Brien 2015	pan	non	0.72	0.4	1.28	-0.334715	0.296722
Socinski 2014	sun	non	1.08
Ahn 2013	van	non	1.43	0.77	2.65	0.356597	0.315287
Johnson 2008	CAI	non	1.03	0.77	1.37	0.026723	0.146984
Westeel 2005	vin	non	1.08	0.79	1.47	0.07477	0.158414
Hu 2010	vin	non	0.89	0.55	1.43	-0.120081	0.243753
Alfonso 2014	rac	non	0.63	0.46	0.87	-0.457895	0.162568
name	Comparator	Log-hazard	se(log-hazard)
Perol	gem	-0.116	0.16295
	erl	-0.132	0.0956168
	non	0	0.0874274

## Sheet: PFS-HR
name	treatment	base	HR	LCI	UCI	ln（HR）	se（ln（HR)）
Ciuleanu 2009	pem	non	0.5	0.42	0.61	-0.680898	0.0952052
Mubarak 2012	pem	non	0.65	0.35	1.2	-0.43375	0.314322
Paz-Ares 2013	pem	non	0.62	0.49	0.79	-0.474536	0.121844
Brodowicz 2006	gem	non	0.690	0.557	0.855	-0.370922	0.10932
Belani 2010	gem	non	0.974	0.917	1.035	-0.0261232	0.0308799
Kelly 2008	gef	non	0.8	0.58	1.1	-0.224708	0.163275
Gaafar 2011	gef	non	0.61	0.45	0.83	-0.492419	0.156168
Zhang 2012	gef	non	0.42	0.33	0.55	-0.85325	0.130313
Cai 2015	gef	non	0.6	0.03	11.33	-0.539552	1.51378
Cappuzzo 2010	erl	non	0.71	0.62	0.82	-0.338243	0.0713227
Perol 2012	gem	non	0.56	0.44	0.72	-0.574742	0.125632
Perol 2012	erl	non	0.69	0.54	0.88	-0.37201	0.12458
Perol 2012	gem	erl	0.89	0.66	1.19	-0.120781	0.150375
Hanna 2008	doc	non	1.01	0.77	1.33	0.0119071	0.139424
Fidias 2009	doc	non	0.710	0.549	0.918	-0.342607	0.131148
Karayama 2013	pem	doc	1.786	0.926	3.571	0.597982	0.344318
Carter 2012	pac	non	1.51	1.04	2.19	0.411561	0.18997
Belani 2003	pac	non
Butts 2005	BLP	non
Butts 2014	BLP	non	0.87	0.75	1	-0.143841	0.0733883
Giaccone 2015	bel	non	0.99	0.82	1.2	-0.00806469	0.0971358
O'Brien 2015	pan	non	0.67	0.43	1.03	-0.407206	0.222839
Socinski 2014	sun	non	0.59
Ahn 2013	van	non	0.75	0.53	1.05	-0.293044	0.174405
Johnson 2008	CAI	non	1.02	0.82	1.27	0.020283	0.111599
Westeel 2005	vin	non	0.77	0.56	1.07	-0.25608	0.165173
Hu 2010	vin	non
Alfonso 2014	rac	non	0.73	0.53	0.99	-0.322464	0.159395
name	Comparator	Log-hazard	se(log-hazard)
Perol	gem	-0.575	0.106948
	erl	-0.372	0.10571
	non	0	0.0659201
