# Supplementary material for: Single-agent maintenance therapy for advanced non-small cell lung cancer (NSCLC): a systematic review and Bayesian network meta-analysis of 26 randomized controlled trials
Source: PeerJ journal article supplement (doi:10.7717/peerj.2550), 2016-10-20
Supplement: Supplementary_search_strategy.pdf [file Supplementary_search_strategy.pdf]

## Search strategies for PubMed, EMBASE, CENTRAL database

### PubMed search details: 515 results

((((((("randomized controlled trial"[Publication Type] OR "randomized controlled trials as topic"[MeSH Terms] OR "randomized controlled trial"[All Fields] OR "randomised controlled trial"[All Fields]) OR ("controlled clinical trial"[Publication Type] OR "controlled clinical trials as topic"[MeSH Terms] OR "controlled clinical trial"[All Fields])) OR ("random allocation"[MeSH Terms] OR ("random"[All Fields] AND "allocation"[All Fields]) OR "random allocation"[All Fields] OR "randomized"[All Fields])) OR randomly[All Fields]) OR ("clinical trials as topic"[MeSH Terms] OR ("clinical"[All Fields] AND "trials"[All Fields] AND "topic"[All Fields]) OR "clinical trials as topic"[All Fields] OR "trial"[All Fields])) OR groups[All Fields]) NOT (("animals"[MeSH Terms:noexp] OR animals[All Fields]) NOT ("humans"[MeSH Terms] OR "humans"[All Fields])) AND ((consolidation[All Fields] AND ("therapy"[Subheading] OR "therapy"[All Fields] OR "therapeutics"[MeSH Terms] OR "therapeutics"[All Fields])) OR ("maintenance"[MeSH Terms] OR "maintenance"[All Fields]) AND ("therapy"[Subheading] OR "therapy"[All Fields] OR "therapeutics"[MeSH Terms] OR "therapeutics"[All Fields]))) AND (((("lung"[MeSH Terms] OR "lung"[All Fields]) AND (non-small[All Fields] AND ("cells"[MeSH Terms] OR "cells"[All Fields] OR "cell"[All Fields]))) OR ("carcinoma, non-small-cell lung"[MeSH Terms] OR ("carcinoma"[All Fields] AND "non-small-cell"[All Fields] AND "lung"[All Fields]) OR "non-small-cell lung carcinoma"[All Fields] OR "nsccl"[All Fields])) OR "Carcinoma, Non-Small-Cell Lung"[Mesh])

### EMBASE: 632 results

| No.  | Query Results                                                                                                                               | Results | Date       |
|------|---------------------------------------------------------------------------------------------------------------------------------------------|---------|------------|
| #11. | 'non small cell lung cancer'/exp OR nsccl OR (non AND small AND cell AND lung AND cancer) OR ('non small' AND cell AND lung AND cancer) AND | 632     | 9 Nov 2015 |

|      |                                                                                                                                                                                                                                  |           |            |
|------|----------------------------------------------------------------------------------------------------------------------------------------------------------------------------------------------------------------------------------|-----------|------------|
|      | (consolidation AND therapy OR (maintenance AND therapy) OR 'maintenance therapy'/exp) AND ('controlled clinical trial'/de OR 'randomized controlled trial'/de)                                                                   |           |            |
| #10. | 'non small cell lung cancer'/exp OR nslc OR (non AND small AND cell AND lung AND cancer) OR ('non small' AND cell AND lung AND cancer) AND (consolidation AND therapy OR (maintenance AND therapy) OR 'maintenance therapy'/exp) | 10,388    | 9 Nov 2015 |
| #9.  | consolidation AND therapy OR (maintenance AND therapy) OR 'maintenance therapy'/exp                                                                                                                                              | 1,102,684 | 9 Nov 2015 |
| #8.  | 'non small cell lung cancer'/exp OR nslc OR (non AND small AND cell AND lung AND cancer) OR ('non small' AND cell AND lung AND cancer)                                                                                           | 101,421   | 9 Nov 2015 |
| #7.  | 'maintenance therapy'/exp                                                                                                                                                                                                        | 1,024,838 | 9 Nov 2015 |
| #6.  | maintenance AND therapy                                                                                                                                                                                                          | 106,820   | 9 Nov 2015 |
| #5.  | consolidation AND therapy                                                                                                                                                                                                        | 14,232    | 9 Nov 2015 |
| #4.  | 'non small' AND cell AND lung AND cancer                                                                                                                                                                                         | 77,601    | 9 Nov 2015 |
| #3.  | non AND small AND cell AND lung AND cancer                                                                                                                                                                                       | 81,525    | 9 Nov 2015 |
| #2.  | nslc                                                                                                                                                                                                                             | 41,554    | 9 Nov 2015 |
| #1.  | 'non small cell lung cancer'/exp                                                                                                                                                                                                 | 87,341    | 9 Nov 2015 |

**CENTRAL: 219 results**

|    |                                                                     |      |
|----|---------------------------------------------------------------------|------|
| #1 | MeSH descriptor: [Carcinoma, Non-Small-Cell Lung] explode all trees | 2559 |
| #2 | nslc                                                                | 3456 |
| #3 | non-small cell lung cancer                                          | 5420 |
| #4 | consolidation therapy                                               | 1314 |
| #5 | MeSH descriptor: [Maintenance Chemotherapy] explode all trees       | 127  |
| #6 | Maintenance Chemotherapy                                            | 2118 |
| #7 | #1 or #2 or #3                                                      | 5822 |

#8 #4 or #5 or #6 3150

#9 #7 and #8 in Trials 219
