# Supplementary material for: Single-agent maintenance therapy for advanced non-small cell lung cancer (NSCLC): a systematic review and Bayesian network meta-analysis of 26 randomized controlled trials
Source: PeerJ. 2016 Oct 20;4:e2550. doi: 10.7717/peerj.2550 (PMC5075715; doi:10.7717/peerj.2550)
Supplement: Table S3 [file peerj-04-2550-s003.xlsx]

## Sheet: Sheet1
Regimen	none		swi-pem		con-pem		con-gem		swi-gef		swi-erl		swi-doc		con-pac		swi-BLP		swi-bel		swi-paz		swi-sun		swi-van		swi-CAI		swi-vin		swi-rac
	direct	NMA	direct	NMA	direct	NMA	direct	NMA	direct	NMA	direct	NMA	direct	NMA	direct	NMA	direct	NMA	direct	NMA	direct	NMA	direct	NMA	direct	NMA	direct	NMA	direct	NMA	direct	NMA
none			0.79 （0.65-0.95） High	0.79 （0.60-1.04） High	0.79a (0.65-0.96) Moderate	0.83 (0.64-1.06) Moderate	0.92a (0.75-1.13) Moderate	0.91 (0.72-1.15) Moderate	0.80a (0.66-0.96) Moderate	0.80 (0.65-0.97) Moderate	0.83a (0.72-0.94) Moderate	0.84 (0.70-1.01) Moderate	1.06 (0.75-1.50) Very Low	1.01 (0.68-1.46) Very Low	1.22a (0.85-1.73) Very Low	1.23 (0.83-1.75) Very Low	0.85a (0.74-0.99) Low	0.85 (0.67-1.03) Low	0.94 (0.73-1.20) High	0.95 (0.70-1.27) High	0.72 (0.40-1.28) Moderate	0.75 (0.40-1.30) Moderate	1.08 (0.78-1.52) Moderate	1.11 (0.75-1.57) Moderate	1.43 (0.77-2.65) Low	1.49 (0.72-2.72) Low	1.03 (0.77-1.37) Low	1.04 (0.73-1.43) Low	1.02a (0.79-1.32) Very Low	1.03 (0.77-1.33) Very Low	0.63 (0.46-0.87) High	0.64 (0.45-0.92) High
swi-pem					/	1.06 (0.73-1.51) Moderate	/	1.17 (0.82-1.60) Moderate	/	1.03 (0.72-1.41) Moderate	/	1.08 (0.79-1.46) Moderate	/	1.29 (0.80-2.01) Very Low	/	1.58 (0.97-2.38) Very Low	/	1.09 (0.77-1.50) Low	/	1.22 (0.82-1.75) High	/	0.96 (0.47-1.73)	/	1.42 (0.89-2.17) Moderate	/	1.92 (0.88-3.61) Low	/	1.33 (0.84-1.96) Low	/	1.32 (0.88-1.90) Very Low	/	0.83 (0.53-1.27) High
con-pem							/	1.12 (0.80-1.52) Moderate	/	0.98 (0.70-1.33) Moderate	/	1.03 (0.74-1.41) Moderate	0.79 (0.30-2.00) Very Low	1.23 (0.79-1.85) Very Low	/	1.51 (0.93-2.27) Very Low	/	1.04 (0.73-1.36) Low	/	1.17 (0.77-1.70) Moderate	/	0.91 (0.46-1.63) Moderate	/	1.36 (0.86-2.02) Moderate	/	1.84 (0.89-3.58) Low	/	1.27 (0.83-1.91) Low	/	1.26 (0.85-1.80) Very Low	/	0.79 (0.49-1.18) Moderate
con-gem									/	0.89 (0.65-1.18) Moderate	1.05 (0.72-1.51) Low	0.93 (0.70-1.19) Low	/	1.12 (0.711-1.70) Very Low	/	1.36 (0.87-2.04) Very Low	/	0.94 (0.70-1.24) Low	/	1.05b (0.72-1.54) Moderate	/	0.82b (0.43-1.47) Moderate	/	1.23b (0.78-1.85) Moderate	/	1.65b (0.77-3.00) Low	/	1.15b (0.77-1.71) Low	/	1.14b (0.78-1.56) Very Low	/	0.72b (0.46-1.07) Moderate
swi-gef											/	1.06 (0.80-1.40) Moderate	/	1.27 (0.83-1.97) Very Low	/	1.56 (0.99-2.36) Very Low	/	1.07 (0.80-1.39) Low	/	1.20 (0.82-1.73) Moderate	/	0.94 (0.48-1.71) Moderate	/	1.40 (0.91-2.09) Moderate	/	1.88 (0.91-3.47) Low	/	1.31 (0.88-1.93) Low	/	1.30 (0.94-1.79) Very Low	/	0.81 (0.53-1.23) Moderate
swi-erl													/	1.21 (0.76-1.80) Very Low	/	1.48 (0.93-2.25) Very Low	/	1.02 (0.76-1.30) Low	/	1.14b (0.81-1.59) Moderate	/	0.90b (0.46-1.63) Moderate	/	1.33 (0.88-1.99) Moderate	/	1.79b (0.86-3.38) Low	/	1.25b (0.84-1.76) Low	/	1.24b (0.86-1.69) Very Low	/	0.77b (0.50-1.15) Moderate
swi-doc															/	1.27 (0.72-2.06) Very Low	/	0.87 (0.55-1.28) Very Low	/	0.98 (0.59-1.50) Very Low	/	0.77 (0.36-1.50) Very Low	/	1.14 (0.63-1.84) Very Low	/	1.53 (0.70-3.13) Very Low	/	1.07 (0.62-1.73) Very Low	/	1.06 (0.67-1.63) Very Low	/	0.66 (0.37-1.07) Very Low
con-pac																	/	0.72 (0.45-1.07) Very Low	/	0.80 (0.49-1.26) Very Low	/	0.63 (0.28-1.20) Very Low	/	0.94 (0.53-1.58) Very Low	/	1.26 (0.56-2.42) Very Low	/	0.87 (0.52-1.40) Very Low	/	0.87 (0.53-1.33) Very Low	/	0.54 (0.31-0.93) Very Low
swi-BLP																			/	1.14 (0.78-1.62) Low	/	0.89 (0.45-1.62) Low	/	1.32 (0.86-1.98) Low	/	1.78 (0.88-3.28) Low	/	1.24 (0.82-1.87) Low	/	1.22 (0.86-1.69) Very Low	/	0.77 (0.51-1.16) Low
swi-bel																					/	0.80 (0.40-1.50) Moderate	/	1.19 (0.71-1.81) Moderate	/	1.60 (0.76-3.18) Low		1.12 (0.68-1.62) Low	/	1.11 (0.72-1.60) Very Low	/	0.69 (0.43-1.13) High
swi-paz																							/	1.63 (0.74-3.04) Low	/	2.20 (0.80-4.86) Low	/	1.52 (0.71-2.80) Very Low	/	1.51 (0.73-2.63) Very Low	/	0.94 (0.44-1.77) Moderate
swi-sun																									/	1.39 (0.63-2.82) Low	/	0.97 (0.56-1.53) Low	/	0.96 (0.60-1.44) Very Low	/	0.60 (0.35-0.98) Moderate
swi-van																											/	0.78 (0.35-1.49) Low	/	0.77 (0.36-1.56) Very Low	/	0.48 (0.22-0.93) Low
swi-CAI																													/	1.02 (0.65-1.55) Very Low	/	0.64 (0.37-1.01) Low
swi-vin																															/	0.64 (0.40-1.00) Very Low
swi-rac
Direct data are presented as HRs and 95% CIs for non-pooled data (i.e. one trial),and HRs and 95% CrIs for meta-analysed data (indicated by a). All NMA data are presented as HRs and 95% CrIs.
a Meta-analysed data
b three-arm trial
